# Supplementary material
Source: PubMed Central journal article supplement (PMC2626347)

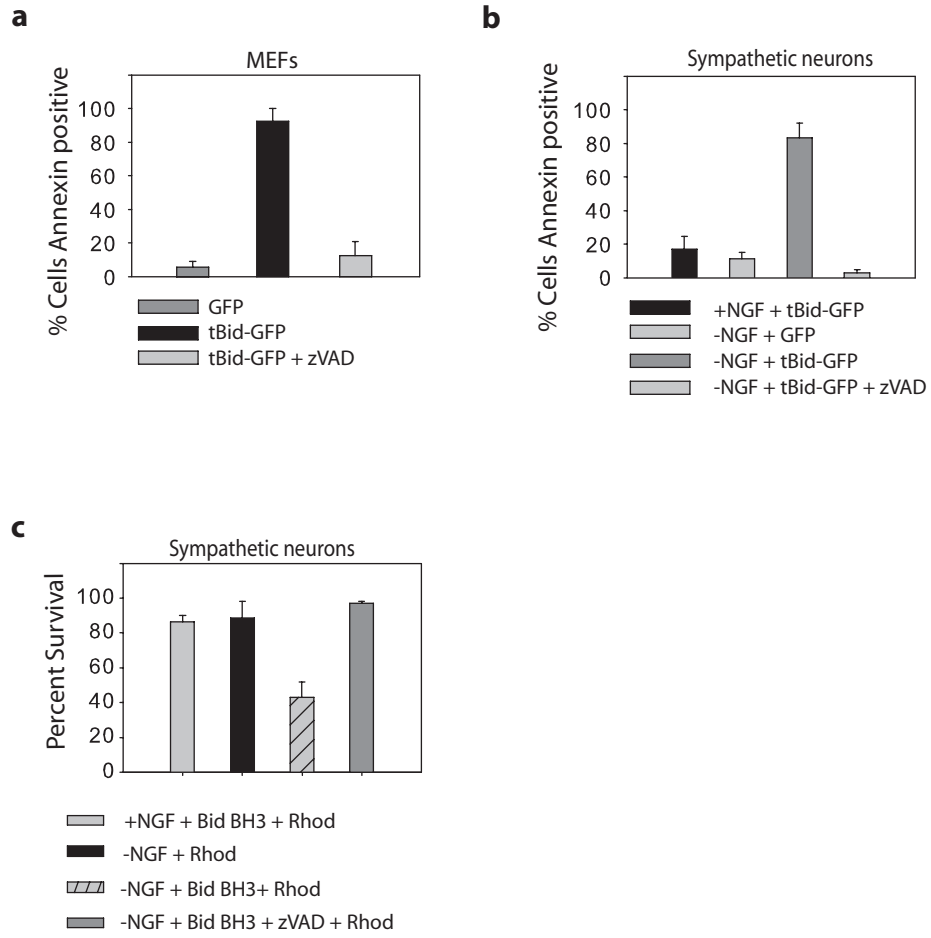

Supplement: NIHMS70874-supplement-1.pdf [file NIHMS70874-supplement-1.pdf]

**a**

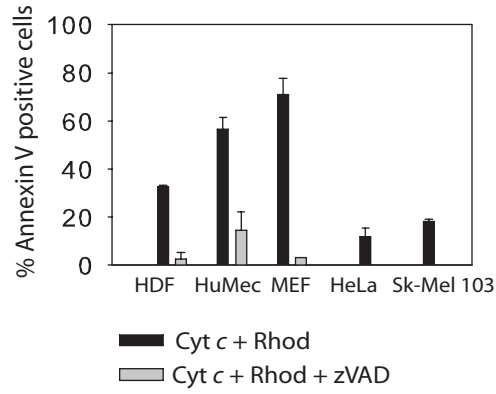

**b**

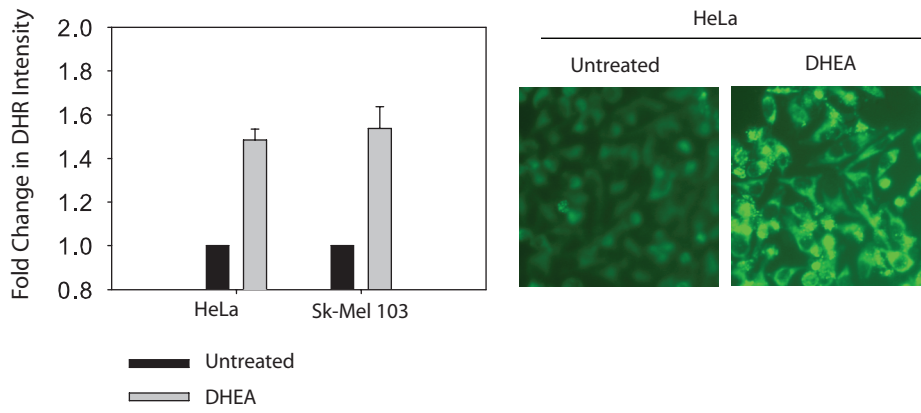

Supplement: NIHMS70874-supplement-10.pdf [file NIHMS70874-supplement-10.pdf]

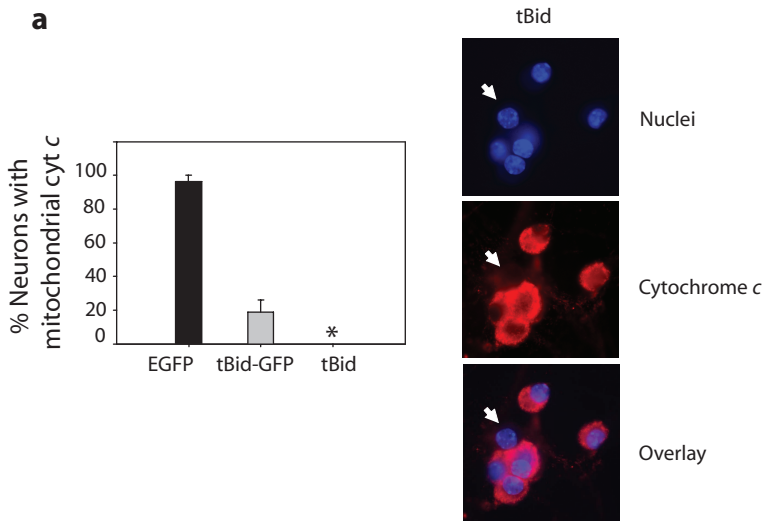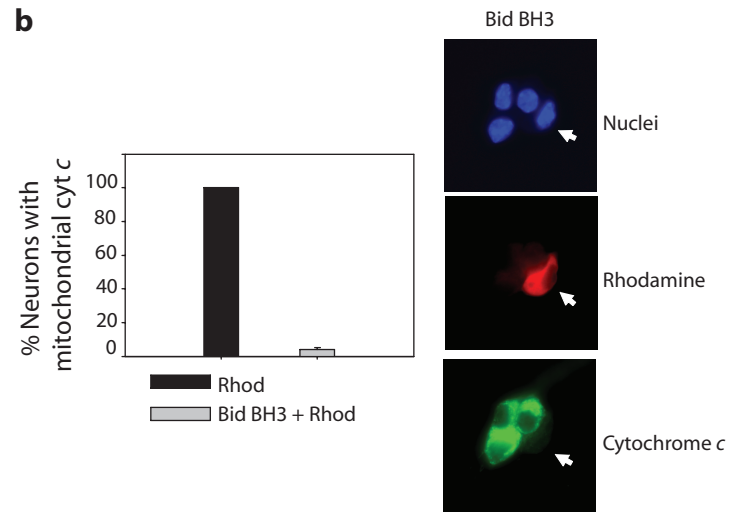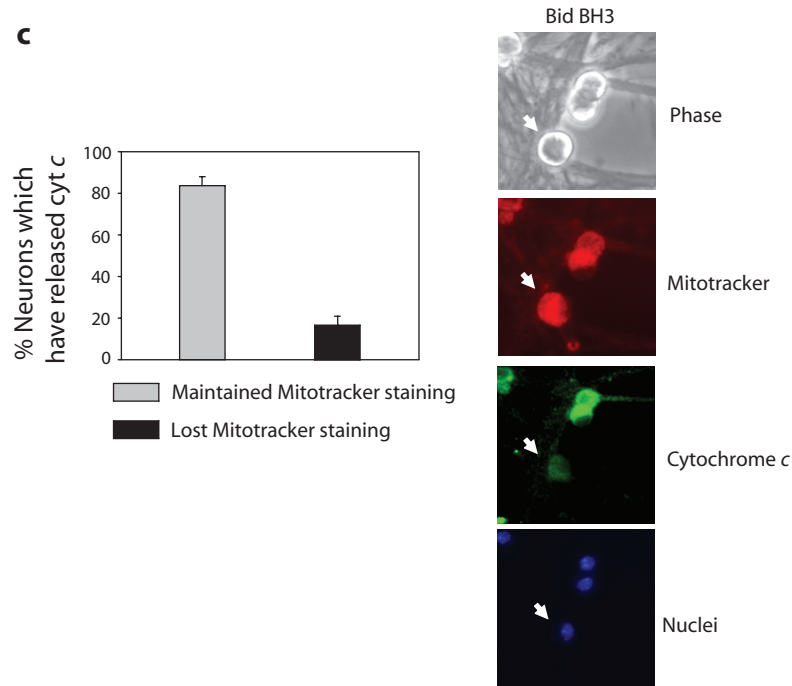

Supplement: NIHMS70874-supplement-2.pdf [file NIHMS70874-supplement-2.pdf]

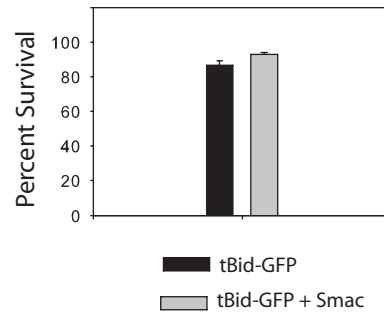

Supplement: NIHMS70874-supplement-3.pdf [file NIHMS70874-supplement-3.pdf]

**a**

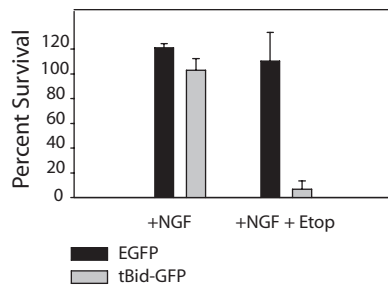

**b**

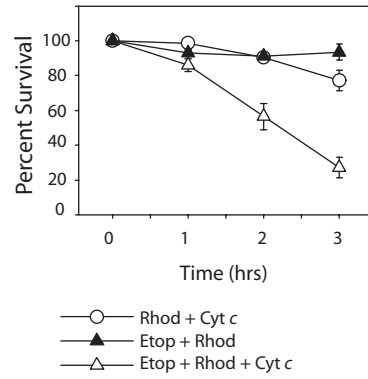

Supplement: NIHMS70874-supplement-4.pdf [file NIHMS70874-supplement-4.pdf]

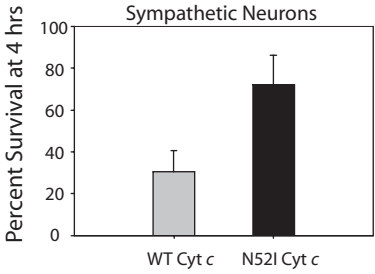

Supplement: NIHMS70874-supplement-5.pdf [file NIHMS70874-supplement-5.pdf]

**a**

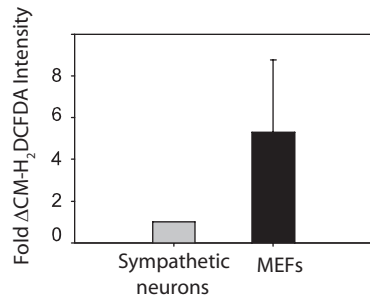

**b**

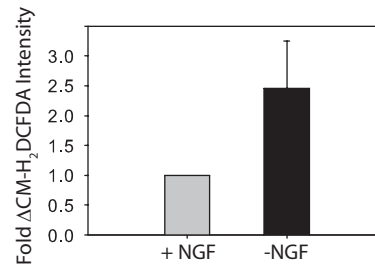

**c**

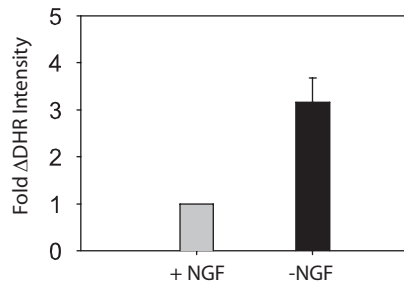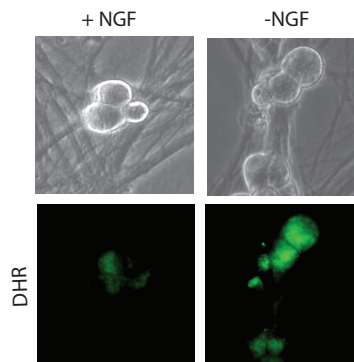

Supplement: NIHMS70874-supplement-6.pdf [file NIHMS70874-supplement-6.pdf]

**a**

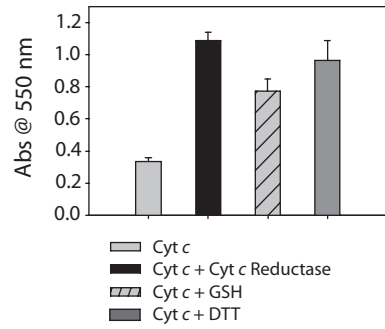

**b**

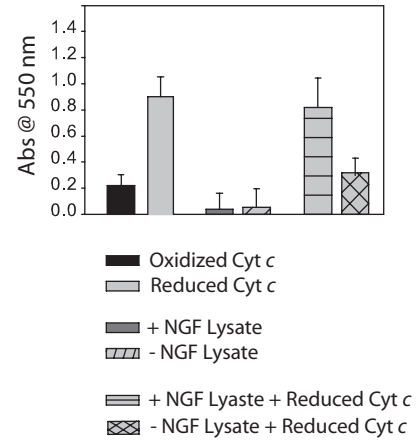

Supplement: NIHMS70874-supplement-7.pdf [file NIHMS70874-supplement-7.pdf]

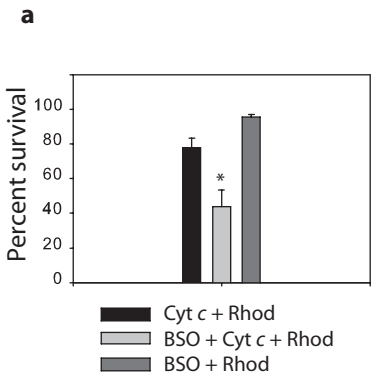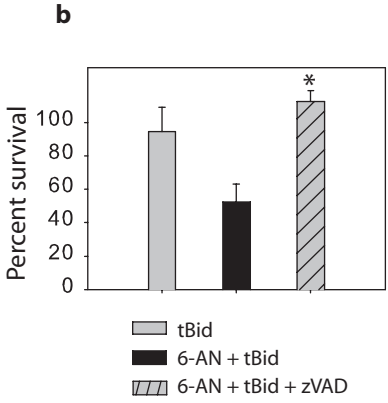

Supplement: NIHMS70874-supplement-8.pdf [file NIHMS70874-supplement-8.pdf]

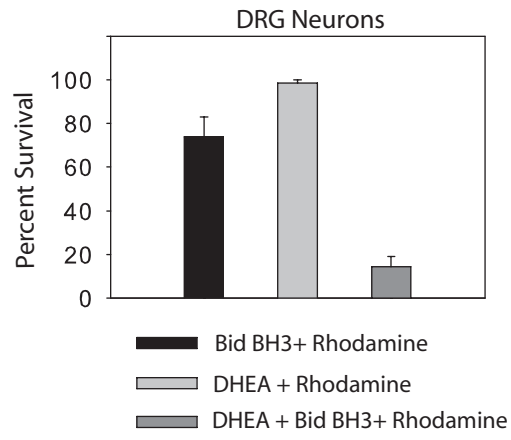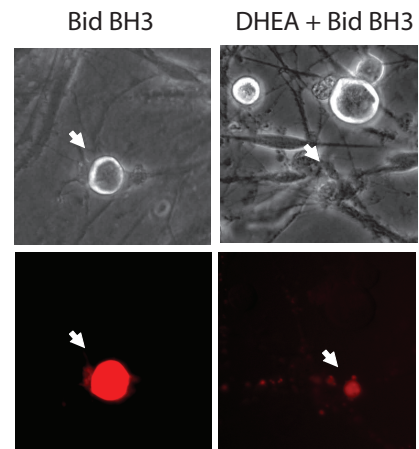

Supplement: NIHMS70874-supplement-9.pdf [file NIHMS70874-supplement-9.pdf]
